# Supplementary material for: Assessing sources and fractions of metals associated with environmental plastics: a case study in Lake Como (Italy)
Source: Royal Society of Chemistry journal article supplement (doi:10.1039/d3va00254c), 2023-01-01
Supplement: d3va00254c1.pdf [file d3va00254c1.pdf]

**Assessing sources and fractions of metals associated with beached plastic litter: a case study in Lake Como (Italy)**

Stefano Carnati,<sup>a</sup> Andrea Pozzi,<sup>a</sup> Davide Spanu,<sup>a</sup> Damiano Monticelli,<sup>a</sup> Roberta Bettinetti,<sup>b</sup> Ginevra Boldrocchi,<sup>b</sup> Luca Nizzetto<sup>c,d</sup> and Gilberto Binda<sup>\*a,c</sup>

\* Corresponding Author, email: gilberto.binda@uninsubria.it

<sup>a</sup> Department of Science and High Technology, University of Insubria, Via Valleggio 11, 22100 Como, Italy

<sup>b</sup> Department of Human and Innovation for the Territory, University of Insubria, Via Valleggio 11, 22100 Como, Italy

<sup>c</sup> Norwegian Institute for Water Research (NIVA), Økernveien 94, 0579 Oslo, Norway

<sup>d</sup> RECETOX, Masarik University, Kamenice 753/5, 625 00 Brno, Czech Republic

**Electronic supporting information: Tables S1-S5 and Figs. S1-S5**

**Table S1** Acid digestion data for all the samples analysed. Average values and relative standard deviations (RSD) of three replicates analyses per sample are reported.

| <b>Sample</b>  |                                       | <b>Al</b> | <b>Ti</b> | <b>V</b> | <b>Cr</b> | <b>Mn</b> | <b>Fe</b> | <b>Co</b> | <b>Ni</b> | <b>Cu</b> |
|----------------|---------------------------------------|-----------|-----------|----------|-----------|-----------|-----------|-----------|-----------|-----------|
| <b>PEvir1</b>  | Average [ $\mu\text{g}/\text{cm}^3$ ] | 245.884   | 12.043    | 0.039    | 0.511     | 0.256     | 10.712    | 0.040     | 0.369     | 13.846    |
|                | RSD [%]                               | 10.8      | 11.3      | 20.9     | 39.8      | 7.4       | 12.1      | 123.7     | 5.2       | 33.7      |
| <b>PEenv2</b>  | Average [ $\mu\text{g}/\text{cm}^3$ ] | 250.320   | 7.652     | 0.063    | 0.690     | 1.699     | 128.900   | 0.083     | 0.762     | 30.418    |
|                | RSD [%]                               | 0.1       | 19.5      | 39.6     | 28.0      | 27.8      | 1.6       | 102.1     | 40.2      | 14.0      |
| <b>PEenv3</b>  | Average [ $\mu\text{g}/\text{cm}^3$ ] | 145.738   | 27.004    | 0.100    | 1.620     | 9.488     | 79.255    | 0.095     | 1.424     | 0.783     |
|                | RSD [%]                               | 4.0       | 11.4      | 0.9      | 35.9      | 2.6       | 0.8       | 0.7       | 4.2       | 68.0      |
| <b>PPvir1</b>  | Average [ $\mu\text{g}/\text{cm}^3$ ] | 68.720    | 1.167     | 0.004    | 0.247     | 0.120     | 4.915     | 0.004     | 0.132     | 0.076     |
|                | RSD [%]                               | 5.7       | 8.8       | 18.8     | 37.1      | 21.8      | 15.9      | 67.9      | 39.6      | -         |
| <b>PPenv2</b>  | Average [ $\mu\text{g}/\text{cm}^3$ ] | 91.399    | 6.313     | 0.175    | 0.934     | 4.431     | 195.178   | 0.104     | 0.561     | 0.930     |
|                | RSD [%]                               | 41.2      | 77.0      | 84.9     | 23.9      | 24.5      | 94.1      | 34.3      | 16.7      | 32.6      |
| <b>PPenv3</b>  | Average [ $\mu\text{g}/\text{cm}^3$ ] | 74.417    | 1.015     | 0.006    | 0.272     | 0.596     | 49.605    | 0.006     | 0.207     | 0.446     |
|                | RSD [%]                               | 0.3       | 17.1      | 14.2     | 68.4      | 4.2       | 2.3       | 34.6      | 37.0      | 13.8      |
| <b>PETvir1</b> | Average [ $\mu\text{g}/\text{cm}^3$ ] | 0.446     | 2.560     | 0.004    | 0.109     | 0.454     | 71.708    | 0.683     | 0.309     | 0.262     |
|                | RSD [%]                               | 0.0       | 48.4      | 0.0      | 0.0       | 30.7      | 35.4      | 9.2       | 0.0       | 33.4      |
| <b>PETenv2</b> | Average [ $\mu\text{g}/\text{cm}^3$ ] | 4.524     | 1.074     | 0.013    | 0.479     | 0.485     | 62.419    | 0.227     | 0.308     | 0.281     |
|                | RSD [%]                               | 137.2     | 127.7     | 0.0      | 0.0       | 34.7      | 17.7      | 12.3      | 0.0       | 79.9      |
| <b>PETenv3</b> | Average [ $\mu\text{g}/\text{cm}^3$ ] | 20.645    | 1.570     | 0.038    | 1.311     | 0.998     | 74.752    | 0.095     | 1.004     | 0.400     |
|                | RSD [%]                               | 10.4      | 106.5     | 7.3      | 3.2       | 3.4       | 4.9       | 0.9       | 7.7       | 25.7      |

  

| <b>Sample</b>  |                                       | <b>Zn</b> | <b>As</b> | <b>Sr</b> | <b>Ag</b> | <b>Cd</b> | <b>Sn</b> | <b>Ba</b> | <b>Pb</b> | <b>U</b> |
|----------------|---------------------------------------|-----------|-----------|-----------|-----------|-----------|-----------|-----------|-----------|----------|
| <b>PEvir1</b>  | Average [ $\mu\text{g}/\text{cm}^3$ ] | 49.478    | <LOD      | 0.472     | 0.048     | 0.002     | 13.033    | 0.500     | 0.086     | 0.005    |
|                | RSD [%]                               | 138.1     | -         | 1.7       | 0.4       | 71.0      | 4.5       | 38.8      | 12.0      | 19.9     |
| <b>PEenv2</b>  | Average [ $\mu\text{g}/\text{cm}^3$ ] | 95.497    | 0.018     | 0.942     | 0.125     | 0.072     | 27.097    | 1.331     | 0.193     | 0.008    |
|                | RSD [%]                               | 124.0     | 53.6      | 24.2      | 104.7     | 10.5      | 8.7       | 2.5       | 15.0      | 5.8      |
| <b>PEenv3</b>  | Average [ $\mu\text{g}/\text{cm}^3$ ] | 27.252    | 0.093     | 0.618     | 0.233     | 0.041     | 77.946    | 1.178     | 0.834     | 0.006    |
|                | RSD [%]                               | 14.4      | 18.1      | 2.9       | 128.2     | 4.1       | 44.0      | 2.4       | 11.5      | 2.2      |
| <b>PPvir1</b>  | Average [ $\mu\text{g}/\text{cm}^3$ ] | 4.660     | <LOD      | 0.049     | 0.203     | 0.000     | 7.595     | 0.838     | 0.048     | 0.000    |
|                | RSD [%]                               | 113.7     | -         | 73.3      | -         | 67.6      | 0.8       | 127.9     | 30.7      | 103.8    |
| <b>PPenv2</b>  | Average [ $\mu\text{g}/\text{cm}^3$ ] | 609.941   | 0.208     | 19.861    | 1.145     | 0.010     | 33.900    | 1151.877  | 0.607     | 0.011    |
|                | RSD [%]                               | 34.5      | 94.0      | 88.8      | 140.8     | 97.8      | 40.1      | 87.0      | 33.2      | 75.7     |
| <b>PPenv3</b>  | Average [ $\mu\text{g}/\text{cm}^3$ ] | 2.289     | <LOD      | 0.061     | 0.188     | 0.023     | 14.606    | 0.561     | 0.125     | 0.001    |
|                | RSD [%]                               | 40.3      | -         | 0.3       | -         | 2.0       | 5.5       | 116.3     | 93.7      | -        |
| <b>PETvir1</b> | Average [ $\mu\text{g}/\text{cm}^3$ ] | 2.237     | 0.020     | 0.048     | 0.098     | 0.042     | 33.897    | <LOD      | 0.093     | <LOD     |
|                | RSD [%]                               | 57.0      | 0.0       | 65.3      | 17.8      | 38.4      | 6.0       | -         | 13.2      | -        |
| <b>PETenv2</b> | Average [ $\mu\text{g}/\text{cm}^3$ ] | 2.566     | 0.000     | 0.104     | 3.426     | 0.003     | 47.588    | 0.244     | 0.160     | 0.009    |
|                | RSD [%]                               | 30.8      | 0.0       | 7.8       | 135.6     | 30.7      | 10.2      | 0.0       | 1.0       | 3.8      |
| <b>PETenv3</b> | Average [ $\mu\text{g}/\text{cm}^3$ ] | 4.197     | 0.052     | 0.169     | 0.289     | 0.117     | 59.263    | <LOD      | 0.302     | 0.004    |
|                | RSD [%]                               | 9.5       | 99.2      | 16.3      | 39.4      | 72.6      | 4.7       | -         | 45.1      | 0.8      |

**Table S2** Sequential extractions data and 2% HNO<sub>3</sub> direct extraction data for all the samples analysed (expressed as µg/cm<sup>3</sup>). Average values of three replicates per sample are reported.

| Sample         | Extraction                | Al                    | Ti                    | V                     | Cr                    | Mn                    | Fe                    | Co                    | Ni                    | Cu                    |
|----------------|---------------------------|-----------------------|-----------------------|-----------------------|-----------------------|-----------------------|-----------------------|-----------------------|-----------------------|-----------------------|
|                |                           | [µg/cm <sup>3</sup> ] |
| <b>PEvir1</b>  | HNO <sub>3</sub> 2%       | 0.383                 | 0.008                 | 0.001                 | <LOD                  | 0.081                 | 4.192                 | 0.001                 | 0.194                 | <LOD                  |
|                | Ammonium nitrate 1M       | 0.504                 | <LOD                  | <LOD                  | 0.007                 | 0.085                 | 0.146                 | <LOD                  | 0.407                 | 2.069                 |
|                | Acid acetic 0.1M          | 2.400                 | 0.003                 | <LOD                  | <LOD                  | 0.021                 | 0.467                 | <LOD                  | 0.199                 | 0.929                 |
|                | Hydrogen peroxide 30% v/v | <LOD                  | 0.002                 | <LOD                  | <LOD                  | <LOD                  | <LOD                  | <LOD                  | 0.008                 | 0.058                 |
| <b>PEenv2</b>  | HNO <sub>3</sub> 2%       | 2.543                 | 0.042                 | 0.007                 | <LOD                  | 1.632                 | 4.893                 | 0.008                 | 0.456                 | 0.405                 |
|                | Ammonium nitrate 1M       | 0.460                 | <LOD                  | 0.003                 | 0.120                 | 1.490                 | 1.441                 | 0.004                 | 0.376                 | 0.174                 |
|                | Acid acetic 0.1M          | 1.405                 | 0.007                 | 0.002                 | 0.003                 | 0.223                 | 1.706                 | 0.001                 | 0.038                 | 0.123                 |
|                | Hydrogen peroxide 30% v/v | 0.249                 | 0.050                 | 0.002                 | <LOD                  | 0.059                 | 0.328                 | 0.002                 | 0.022                 | 0.136                 |
| <b>PEenv3</b>  | HNO <sub>3</sub> 2%       | 3.428                 | 0.114                 | 0.012                 | <LOD                  | 5.708                 | 10.013                | 0.033                 | 0.173                 | 0.250                 |
|                | Ammonium nitrate 1M       | 0.087                 | <LOD                  | 0.002                 | 0.020                 | 4.323                 | 0.803                 | 0.016                 | 0.166                 | 0.180                 |
|                | Acid acetic 0.1M          | 1.596                 | 0.025                 | 0.004                 | <LOD                  | 1.309                 | 3.909                 | 0.010                 | <LOD                  | <LOD                  |
|                | Hydrogen peroxide 30% v/v | 1.553                 | 0.268                 | 0.004                 | <LOD                  | 0.239                 | 0.929                 | 0.003                 | 0.010                 | 0.031                 |
| <b>PPvir1</b>  | HNO <sub>3</sub> 2%       | <LOD                  | <LOD                  | <LOD                  | <LOD                  | 0.042                 | 0.322                 | <LOD                  | 0.105                 | <LOD                  |
|                | Ammonium nitrate 1M       | 0.061                 | <LOD                  | <LOD                  | 0.046                 | 0.096                 | 0.200                 | <LOD                  | <LOD                  | 0.345                 |
|                | Acid acetic 0.1M          | 0.238                 | 0.001                 | <LOD                  | <LOD                  | 0.015                 | 0.795                 | <LOD                  | 0.140                 | 0.271                 |
|                | Hydrogen peroxide 30% v/v | <LOD                  | 0.002                 | <LOD                  | <LOD                  | 0.009                 | <LOD                  | <LOD                  | 0.001                 | <LOD                  |
| <b>PPenv2</b>  | HNO <sub>3</sub> 2%       | 3.126                 | 0.106                 | 0.009                 | 0.011                 | 1.791                 | 8.072                 | 0.009                 | 0.130                 | 0.528                 |
|                | Ammonium nitrate 1M       | 0.382                 | 0.024                 | 0.004                 | <LOD                  | 2.466                 | 0.636                 | 0.009                 | 0.045                 | <LOD                  |
|                | Acid acetic 0.1M          | 1.507                 | 0.019                 | 0.003                 | <LOD                  | 0.332                 | 3.457                 | 0.002                 | <LOD                  | <LOD                  |
|                | Hydrogen peroxide 30% v/v | 2.849                 | 0.856                 | 0.006                 | <LOD                  | 0.101                 | 2.313                 | 0.002                 | 0.030                 | 0.073                 |
| <b>PPenv3</b>  | HNO <sub>3</sub> 2%       | 0.038                 | 0.029                 | 0.002                 | <LOD                  | 0.262                 | 1.784                 | 0.001                 | 0.124                 | <LOD                  |
|                | Ammonium nitrate 1M       | 0.318                 | 0.001                 | <LOD                  | <LOD                  | 0.065                 | 0.096                 | <LOD                  | 0.106                 | <LOD                  |
|                | Acid acetic 0.1M          | 0.495                 | 0.006                 | <LOD                  | <LOD                  | 0.042                 | 1.290                 | <LOD                  | 0.021                 | 0.053                 |
|                | Hydrogen peroxide 30% v/v | <LOD                  | 0.003                 | 0.005                 |
| <b>PETvir1</b> | HNO <sub>3</sub> 2%       | <LOD                  | 0.001                 | <LOD                  | <LOD                  | 0.037                 | 1.109                 | 0.002                 | 0.164                 | <LOD                  |
|                | Ammonium nitrate 1M       | 0.251                 | 0.002                 | <LOD                  | <LOD                  | 0.034                 | 0.107                 | 0.002                 | 0.135                 | 1.688                 |
|                | Acid acetic 0.1M          | 0.552                 | 0.003                 | <LOD                  | 0.009                 | 0.021                 | 0.798                 | <LOD                  | 0.308                 | 0.237                 |
|                | Hydrogen peroxide 30% v/v | 0.154                 | 0.088                 | 0.001                 | <LOD                  | 0.008                 | <LOD                  | <LOD                  | 0.021                 | 0.034                 |
| <b>PETenv2</b> | HNO <sub>3</sub> 2%       | 2.386                 | 0.070                 | 0.002                 | <LOD                  | 0.347                 | 5.484                 | 0.005                 | 0.206                 | 0.023                 |
|                | Ammonium nitrate 1M       | 0.139                 | <LOD                  | <LOD                  | <LOD                  | 0.192                 | 0.918                 | 0.002                 | 0.141                 | 0.161                 |
|                | Acid acetic 0.1M          | 1.419                 | <LOD                  | <LOD                  | <LOD                  | 0.033                 | 2.016                 | <LOD                  | 0.115                 | 0.166                 |
|                | Hydrogen peroxide 30% v/v | <LOD                  | 0.039                 | <LOD                  | <LOD                  | 0.008                 | <LOD                  | <LOD                  | 0.034                 | <LOD                  |
| <b>PETenv3</b> | HNO <sub>3</sub> 2%       | 2.649                 | 0.121                 | 0.007                 | 0.070                 | 0.172                 | 15.157                | 0.006                 | 0.110                 | 0.075                 |
|                | Ammonium nitrate 1M       | 0.107                 | <LOD                  | <LOD                  | <LOD                  | 0.108                 | 0.275                 | 0.002                 | <LOD                  | 0.534                 |
|                | Acid acetic 0.1M          | 1.234                 | 0.010                 | <LOD                  | <LOD                  | 0.007                 | 2.706                 | <LOD                  | 0.241                 | 0.217                 |
|                | Hydrogen peroxide 30% v/v | 0.198                 | 0.010                 | 0.002                 | <LOD                  | 0.021                 | 0.245                 | <LOD                  | 0.027                 | <LOD                  |

Table S2 Continues

| Sample  | Extraction                | Zn                    | As                    | Sr                    | Ag                    | Cd                    | Sn                    | Ba                    | Pb                    | U                     |
|---------|---------------------------|-----------------------|-----------------------|-----------------------|-----------------------|-----------------------|-----------------------|-----------------------|-----------------------|-----------------------|
|         |                           | [µg/cm <sup>3</sup> ] |
| PEvir1  | HNO <sub>3</sub> 2%       | <LOD                  | 0.001                 | 0.017                 | <LOD                  | 0.001                 | 4.115                 | 0.368                 | <LOD                  | <LOD                  |
|         | Ammonium nitrate 1M       | 1.010                 | 0.001                 | 0.012                 | <LOD                  | <LOD                  | 0.156                 | 0.014                 | 0.083                 | <LOD                  |
|         | Acid acetic 0.1M          | 1.467                 | 0.001                 | 0.005                 | <LOD                  | <LOD                  | 0.458                 | 0.023                 | 0.021                 | <LOD                  |
|         | Hydrogen peroxide 30% v/v | <LOD                  | <LOD                  | <LOD                  | 0.001                 | <LOD                  | 0.012                 | <LOD                  | <LOD                  | <LOD                  |
| PEenv2  | HNO <sub>3</sub> 2%       | <LOD                  | 0.028                 | 0.218                 | <LOD                  | 0.001                 | 45.586                | 0.894                 | 0.109                 | 0.001                 |
|         | Ammonium nitrate 1M       | 0.363                 | 0.012                 | 0.151                 | <LOD                  | <LOD                  | 1.154                 | 0.743                 | 0.020                 | <LOD                  |
|         | Acid acetic 0.1M          | <LOD                  | 0.009                 | 0.017                 | <LOD                  | <LOD                  | 0.498                 | 0.337                 | 0.054                 | <LOD                  |
|         | Hydrogen peroxide 30% v/v | 0.040                 | 0.004                 | 0.004                 | 0.004                 | <LOD                  | 0.610                 | 0.045                 | 0.003                 | <LOD                  |
| PEenv3  | HNO <sub>3</sub> 2%       | 1.609                 | 0.068                 | 0.236                 | 0.025                 | 0.003                 | 53.772                | 0.256                 | 0.304                 | 0.002                 |
|         | Ammonium nitrate 1M       | 0.774                 | 0.030                 | 0.139                 | <LOD                  | 0.001                 | 0.676                 | 0.245                 | 0.016                 | <LOD                  |
|         | Acid acetic 0.1M          | <LOD                  | 0.023                 | 0.014                 | <LOD                  | <LOD                  | 1.345                 | 0.118                 | 0.103                 | 0.001                 |
|         | Hydrogen peroxide 30% v/v | <LOD                  | 0.011                 | 0.004                 | <LOD                  | <LOD                  | 1.011                 | 0.057                 | 0.002                 | <LOD                  |
| PPvir1  | HNO <sub>3</sub> 2%       | <LOD                  | <LOD                  | 0.001                 | 0.010                 | <LOD                  | 2.515                 | 0.016                 | <LOD                  | <LOD                  |
|         | Ammonium nitrate 1M       | 0.292                 | 0.001                 | 0.012                 | <LOD                  | <LOD                  | 0.057                 | 0.256                 | 0.099                 | <LOD                  |
|         | Acid acetic 0.1M          | <LOD                  | 0.002                 | 0.004                 | 0.001                 | <LOD                  | 0.430                 | 0.228                 | 0.027                 | <LOD                  |
|         | Hydrogen peroxide 30% v/v | <LOD                  | <LOD                  | 0.001                 | <LOD                  | <LOD                  | 0.028                 | 0.039                 | <LOD                  | <LOD                  |
| PPenv2  | HNO <sub>3</sub> 2%       | 0.723                 | 0.053                 | 0.371                 | 0.000                 | 0.001                 | 20.599                | 10.559                | 0.236                 | 0.002                 |
|         | Ammonium nitrate 1M       | 0.925                 | 0.027                 | 0.541                 | 0.000                 | 0.001                 | 0.242                 | 17.362                | 0.038                 | <LOD                  |
|         | Acid acetic 0.1M          | 0.190                 | 0.019                 | 0.206                 | <LOD                  | <LOD                  | 0.954                 | 11.527                | 0.092                 | 0.001                 |
|         | Hydrogen peroxide 30% v/v | 0.112                 | 0.011                 | 0.079                 | 0.010                 | <LOD                  | 1.673                 | 4.537                 | 0.010                 | <LOD                  |
| PPenv3  | HNO <sub>3</sub> 2%       | 0.305                 | 0.007                 | 0.032                 | 0.020                 | 0.003                 | 17.409                | 0.059                 | 0.019                 | 0.003                 |
|         | Ammonium nitrate 1M       | <LOD                  | <LOD                  | 0.010                 | 0.002                 | 0.006                 | 0.035                 | <LOD                  | <LOD                  | <LOD                  |
|         | Acid acetic 0.1M          | 0.851                 | <LOD                  | 0.003                 | <LOD                  | <LOD                  | 0.238                 | 0.007                 | 0.013                 | <LOD                  |
|         | Hydrogen peroxide 30% v/v | <LOD                  | <LOD                  | <LOD                  | <LOD                  | <LOD                  | 0.025                 | <LOD                  | <LOD                  | 0.001                 |
| PETvir1 | HNO <sub>3</sub> 2%       | <LOD                  | <LOD                  | <LOD                  | <LOD                  | 0.006                 | 2.231                 | 0.028                 | <LOD                  | <LOD                  |
|         | Ammonium nitrate 1M       | 0.884                 | <LOD                  | 0.002                 | 0.001                 | 0.005                 | 0.051                 | <LOD                  | 0.046                 | <LOD                  |
|         | Acid acetic 0.1M          | 1.244                 | 0.008                 | 0.014                 | <LOD                  | <LOD                  | 0.610                 | 0.427                 | 0.070                 | <LOD                  |
|         | Hydrogen peroxide 30% v/v | 0.586                 | <LOD                  | 0.005                 | <LOD                  | <LOD                  | 0.079                 | 0.092                 | <LOD                  | <LOD                  |
| PETenv2 | HNO <sub>3</sub> 2%       | <LOD                  | 0.023                 | 0.058                 | 0.004                 | 0.021                 | 73.860                | 0.333                 | 0.063                 | 0.002                 |
|         | Ammonium nitrate 1M       | 0.002                 | <LOD                  | 0.046                 | <LOD                  | 0.017                 | 0.074                 | 0.208                 | <LOD                  | <LOD                  |
|         | Acid acetic 0.1M          | 1.405                 | <LOD                  | 0.003                 | 0.002                 | 0.002                 | 0.867                 | <LOD                  | 0.110                 | 0.001                 |
|         | Hydrogen peroxide 30% v/v | <LOD                  | <LOD                  | <LOD                  | <LOD                  | <LOD                  | 0.058                 | <LOD                  | <LOD                  | <LOD                  |
| PETenv3 | HNO <sub>3</sub> 2%       | <LOD                  | 0.010                 | 0.034                 | 0.022                 | 0.001                 | 22.987                | 0.263                 | 0.181                 | 0.004                 |
|         | Ammonium nitrate 1M       | 0.842                 | <LOD                  | 0.016                 | <LOD                  | <LOD                  | 0.448                 | <LOD                  | 0.028                 | <LOD                  |
|         | Acid acetic 0.1M          | 1.116                 | <LOD                  | <LOD                  | <LOD                  | <LOD                  | 1.085                 | <LOD                  | 0.085                 | 0.003                 |
|         | Hydrogen peroxide 30% v/v | 3.022                 | <LOD                  | 0.026                 | 0.005                 | 0.002                 | 0.095                 | <LOD                  | 0.025                 | <LOD                  |

**Table S3** Characteristic peaks and corresponding wavelengths used for polymer type identification with attenuated total reflectance FTIR spectroscopy.

| Polymer type | Characteristic peaks used for recognition                                                                                                                                                                                                                                                                                                                                                                                                                |
|--------------|----------------------------------------------------------------------------------------------------------------------------------------------------------------------------------------------------------------------------------------------------------------------------------------------------------------------------------------------------------------------------------------------------------------------------------------------------------|
| PE           | C-H bonds (stretching at 2919 cm <sup>-1</sup> and 2851 cm <sup>-1</sup> ) and CH <sub>2</sub> (bending at 1473 cm <sup>-1</sup> and 1462 cm <sup>-1</sup> , rocking at 730 cm <sup>-1</sup> and 717 cm <sup>-1</sup> ).                                                                                                                                                                                                                                 |
| PP           | C-H stretching (2950 cm <sup>-1</sup> , 2915 cm <sup>-1</sup> , 2838 cm <sup>-1</sup> ), CH <sub>2</sub> bending (1455 cm <sup>-1</sup> ), CH <sub>3</sub> bending (1377 cm <sup>-1</sup> ), CH bending, CH <sub>3</sub> rocking and C-C stretching (1166 cm <sup>-1</sup> ), CH <sub>3</sub> rocking, CH <sub>3</sub> bending and CH bending (972 cm <sup>-1</sup> ), CH <sub>2</sub> rocking and C-CH <sub>3</sub> stretching (840 cm <sup>-1</sup> ). |
| PET          | C=O stretching (1715 cm <sup>-1</sup> ), C-O stretching of aromatic esters (1245 cm <sup>-1</sup> ), C-O stretching of aliphatic esters (1100 cm <sup>-1</sup> ) and C-H bending (720 cm <sup>-1</sup> ).                                                                                                                                                                                                                                                |

**Table S4** Trace metals in Lake Como water sample determined through ICP-MS analysis. Average values after three replicates are reported.

| Metal  | Sr      | Zn     | Al     | Ba    | As    | Fe    | Ni    | Cu    | U     |
|--------|---------|--------|--------|-------|-------|-------|-------|-------|-------|
| [µg/l] | 146.388 | 20.895 | 15.811 | 9.630 | 3.248 | 3.135 | 0.938 | 0.822 | 0.669 |
| Metal  | Cr      | V      | Mn     | Ag    | Sn    | Pb    | Co    | Cd    | Ti    |
| [µg/l] | 0.517   | 0.291  | 0.151  | 0.081 | 0.072 | 0.063 | 0.055 | 0.030 | 0.014 |

**Table S5** Major ions in Lake Como water sample determined through IC analysis. Average values after three replicate analyses are reported.

| Anions  | F <sup>-</sup>  | Cl <sup>-</sup> | Br <sup>-</sup> | NO <sub>3</sub> <sup>2-</sup> | PO <sub>4</sub> <sup>3-</sup> | SO <sub>4</sub> <sup>2-</sup> |
|---------|-----------------|-----------------|-----------------|-------------------------------|-------------------------------|-------------------------------|
| [mg/l]  | 0.07            | 13.72           | <LOD            | 1.73                          | <LOD                          | 21.58                         |
| Cations | Li <sup>+</sup> | Na <sup>+</sup> | K <sup>+</sup>  | Mg <sup>2+</sup>              | Ca <sup>2+</sup>              |                               |
| [mg/l]  | <LOD            | 3.66            | 1.57            | 4.14                          | 15.74                         |                               |

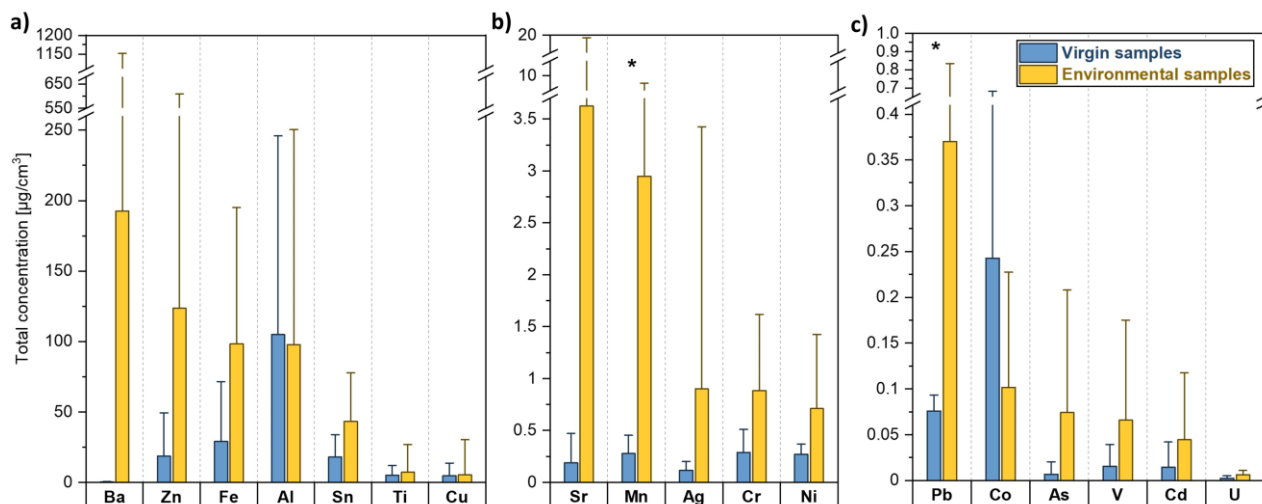

**Fig. S1** Total metal loads determined with acid digestion in virgin and environmental samples. Mean values derived from all the samples analyzed are displayed, with the maximum values detected indicated by the whisker. Metal concentrations are ordered and separated in three graphs (a, b and c) for graphical reasons only. Significantly different data ( $p < 0.05$ ) after Mann-Whitney test are indicated by asterisk. Raw data are reported in **Table S1**.

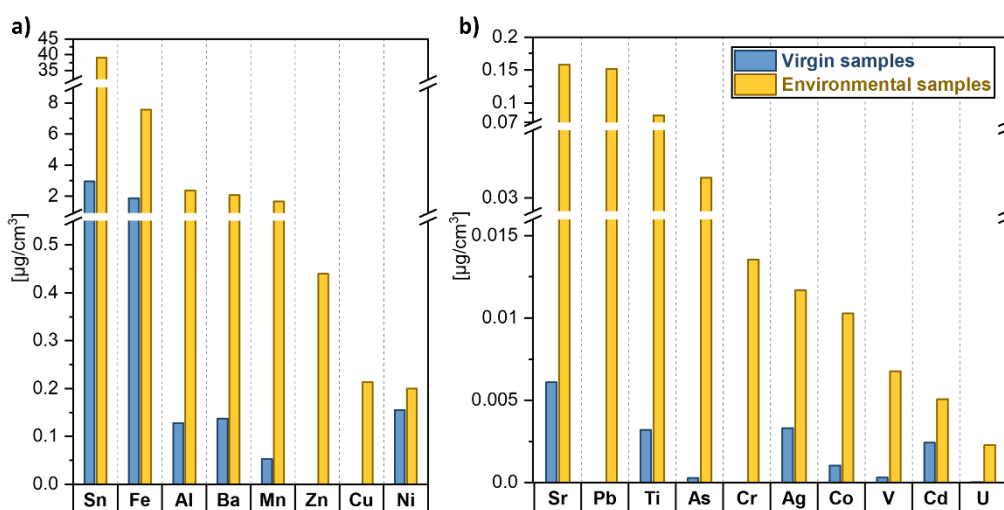

**Fig. S2** Labile metals in plastic samples, determined via 2%  $\text{HNO}_3$  extraction. Mean values distinguished for virgin and environmental samples are displayed. Metals are displayed in two different graphs (a and b) on the basis of their concentrations solely for graphical reasons. Raw data are listed in **Table S2**.

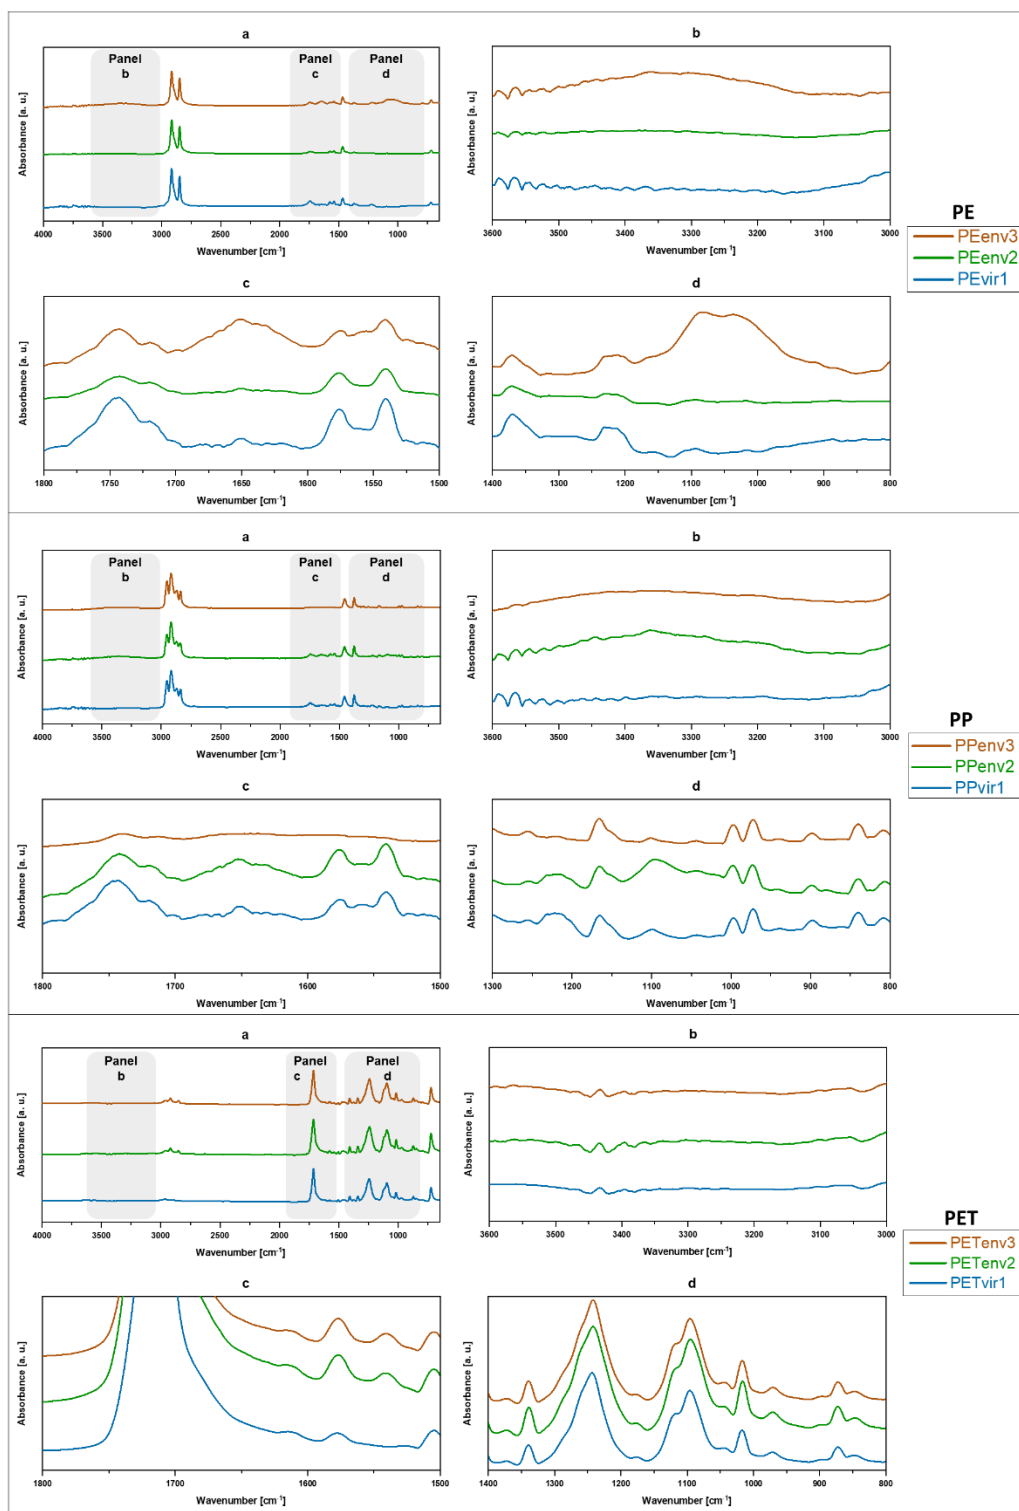

**Fig. S3** FTIR Spectra of the different polymer types: PE; PP; PET. Environmental samples (env) and virgin samples (vir) are shown. For every polymer, the whole spectral window is displayed in figure (a), whereas the other three panels indicate the specific spectral windows analysed at 3600-3000 cm<sup>-1</sup> (b), 1800-1500 cm<sup>-1</sup> (c) and 1400-800 cm<sup>-1</sup> (d).

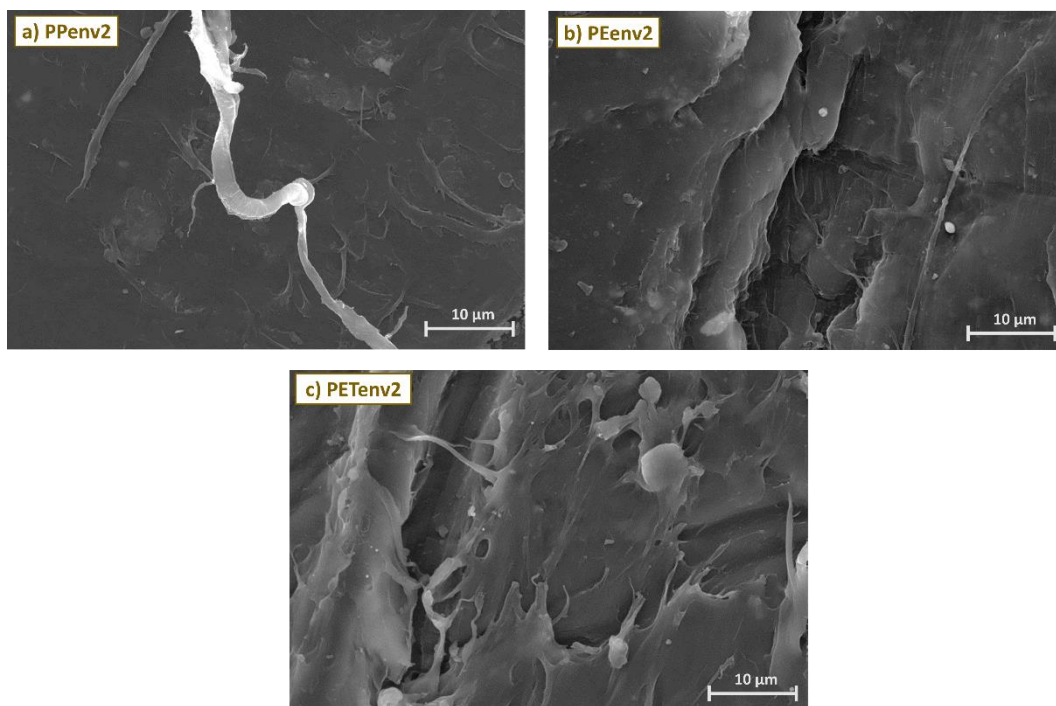

**Fig. S4** Supplementary SEM micrograph of environmental samples. The rugged and wrinkled texture is evident, and some filamentous morphologies are observable.

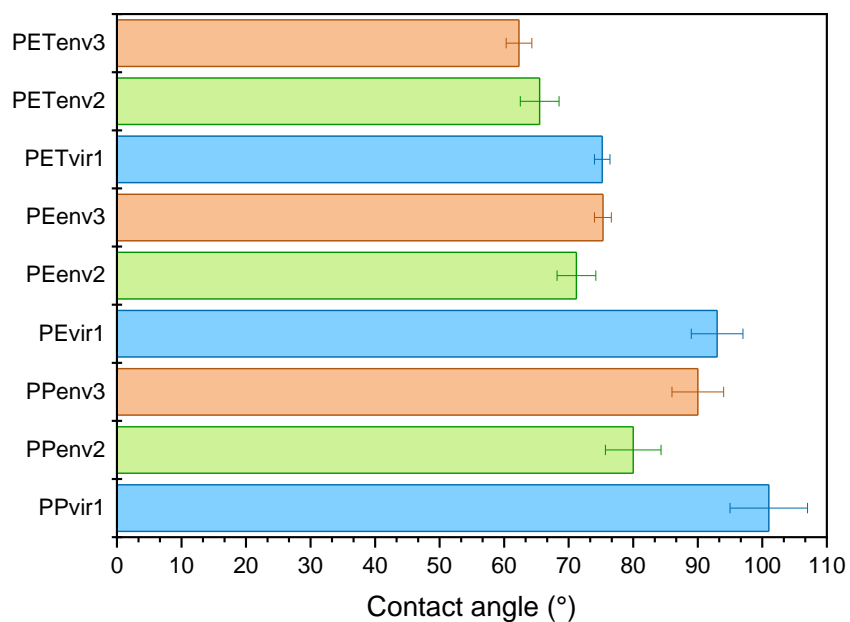

**Fig. S5** Contact angle values of all virgin (in blue) and environmental samples (in green and red). The whiskers show the standard deviation after 3 replicates.
